# Supplementary material for: Innate Immunity in the C. elegans Intestine Is Programmed by a Neuronal Regulator of AWC Olfactory Neuron Development
Source: PubMed Central journal article supplement — Cell Rep. Author manuscript; Available in PMC 2020 May 12. (PMC7215899; doi:10.1016/j.celrep.2020.03.042), 2020-04-07
Supplement: NIHMS1582931-supplement-1.pdf [file NIHMS1582931-supplement-1.pdf]

**Cell Reports, Volume 31**

**Supplemental Information**

**Innate Immunity in the *C. elegans* Intestine  
Is Programmed by a Neuronal Regulator  
of AWC Olfactory Neuron Development**

**Kyle J. Foster, Hilary K. Cheesman, Pengpeng Liu, Nicholas D. Peterson, Sarah M. Anderson, and Read Pukkila-Worley**

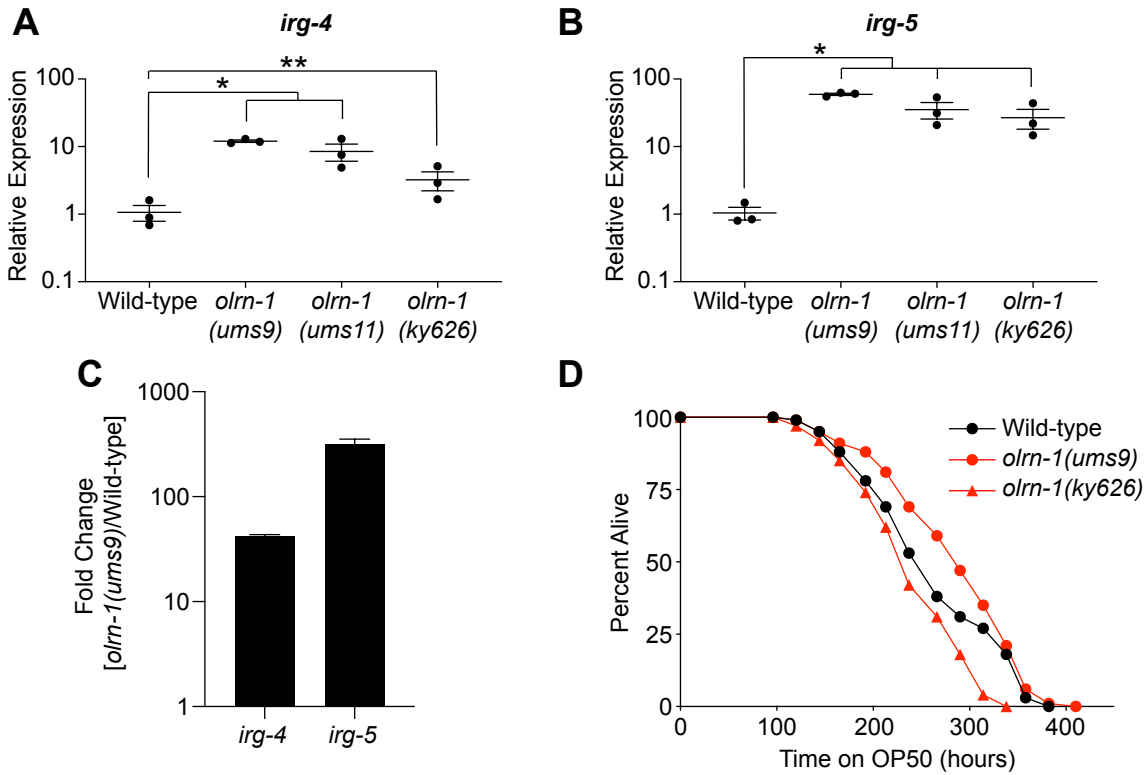

**Figure S1. Loss-of-function mutations in *olnr-1* cause constitutive immune activation, Related to Figure 1.** qRT-PCR data of *irg-4* (A) and *irg-5* (B) in wild-type, *olnr-1*(*ums9*), *olnr-1*(*ums11*) and *olnr-1*(*ky626*) is presented. Data are the average of three independent replicates, each normalized to the control gene *snb-1* with error bars representing SEM, and are presented as the value relative to the average expression from all replicates of the indicated gene in wild-type animals. \* equals  $p < 0.05$  by one-way ANOVA for the indicated comparison. \*\* $p = 0.10$  by one-way ANOVA and  $p < 0.05$  by two-tailed *t*-test. C. Data from a nanoString analysis of *irg-4* and *irg-5* expression, presented as the fold change of gene expression in *olnr-1*(*ums9*) mutants versus wild-type animals. Data are the average of two independent replicates for *olnr-1*(*ums9*) and one sample for wild-type, each normalized to three control genes (*snb-1*, *ama-1* and *act-1*) with error bars representing SEM. D. The lifespan of *olnr-1*(*ums9*) and *olnr-1*(*ky626*) mutant animals is shown relative to wild-type animals. Sample sizes, mean lifespan and *p*-values for each of two trials is shown in Table S2.

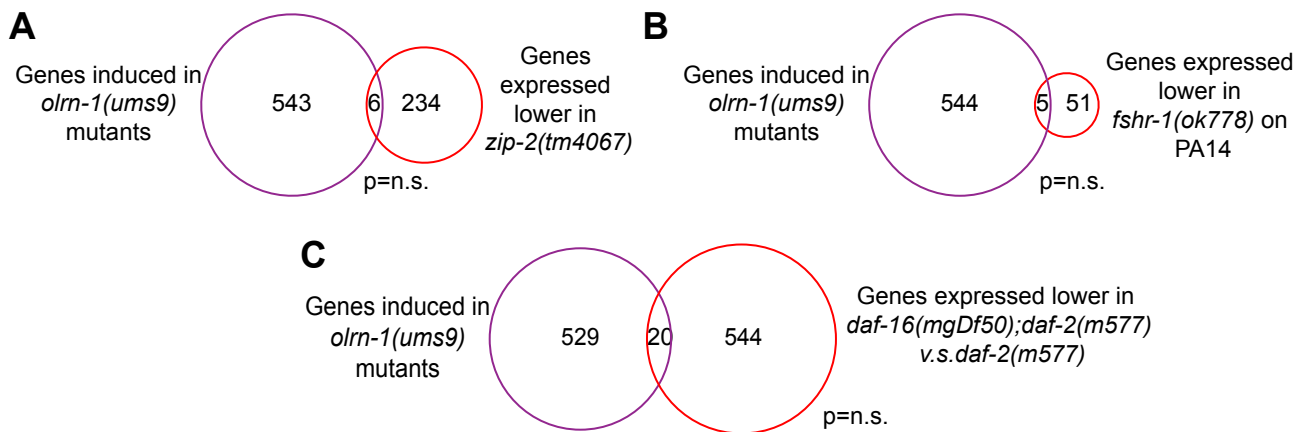

**Figure S2. *oln-1* suppresses the p38 MAPK PMK-1 innate immune pathway, Related to Figure 2.** Venn diagrams show the overlap of genes induced in *oln-1(ums9)* mutants with targets of (A) the bZIP transcription factor *zip-2*, (B) the G protein-coupled receptor *fshr-1*, and (C) the FOXO transcription factor *daf-16*. In A, B and C, the hypergeometric p value for the overlap between these datasets was not significant (n.s.).

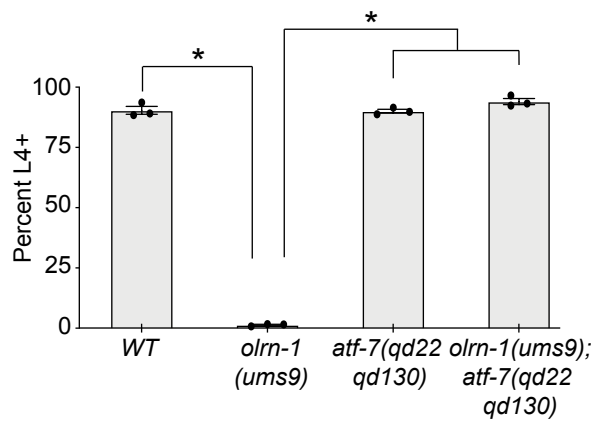

**Figure S3. Promotion of intestinal immune homeostasis by *oln-1* is required to ensure reproduction and development, Related to Figure 4.** Data for *atf-7(qd22 qd130)* and *oln-1(ums9); atf-7(qd22 qd130)* are shown, as explained in the Figure 4 legend. \* equals  $p < 0.05$  by one-way ANOVA.

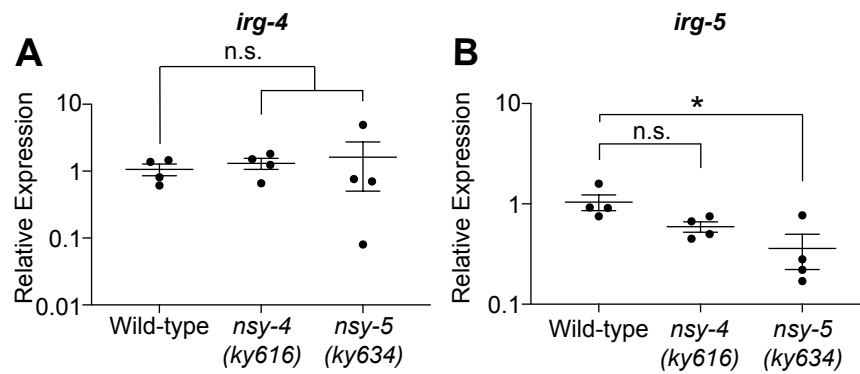

**Figure S4. Expression of *olrn-1* in chemosensory neurons is sufficient to regulate innate immunity in the intestinal epithelium, Related to Figure 5.** qRT-PCR data of *irg-4* (A) and *irg-5* (B) in wild-type, *nsy-4(ky616)* and *nsy-5(ky634)* animals is presented. Data are the average of three independent replicates, each normalized to a control gene with error bars representing SEM, and are presented as the value relative to the average expression from all replicates of the indicated gene in wild-type animals. “n.s.” equals not significant for the p value and \* equals  $p < 0.05$  by one-way ANOVA for the indicated comparison.

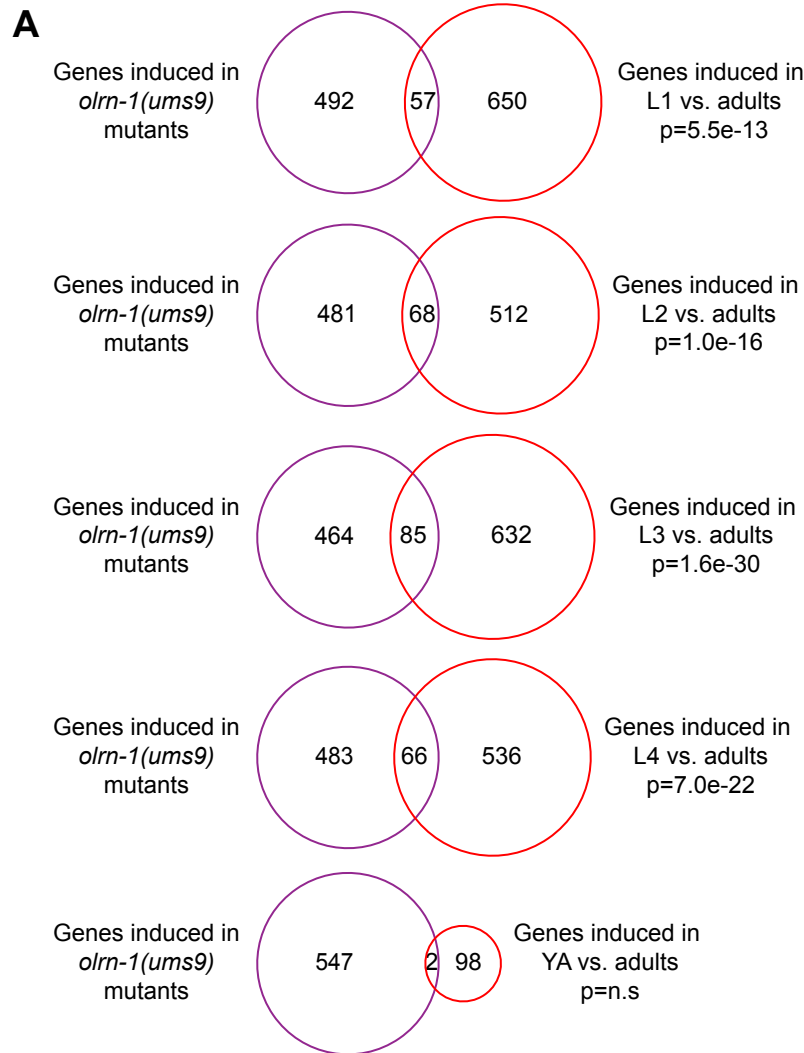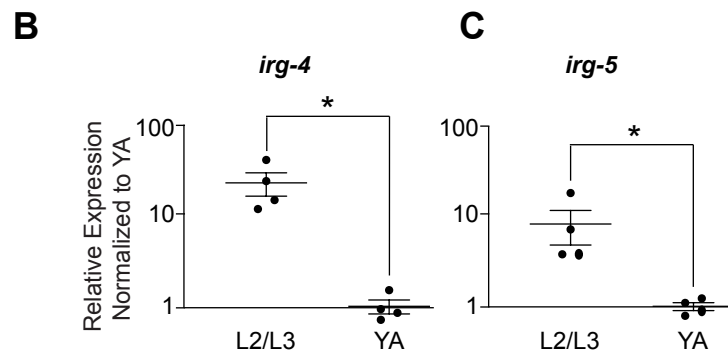

**Figure S5. Neuronal *oln-1* regulates p38 MAPK PMK-1-dependent immune effector expression during nematode development, Related to Figure 6.** **A.** Venn diagrams show the overlap of genes induced in *oln-1(ums9)* mutants with genes that are upregulated at each larval stage in wild-type animals compared to wild-type adult animals. The hypergeometric p value for the overlap of each dataset is given in the figure. “n.s.” equals not significant. qRT-PCR data of *irg-4* (**B**) and *irg-5* (**C**) in wild-type animals at the second or third larval stage (L2/L3), and the young adult (YA) stage are shown. Data are the average of four independent replicates, each normalized to a control gene with error bars representing SEM, and are presented relative to the average expression from all replicates of the indicated gene in animals at the young adult stage. \* equals  $p < 0.05$  by one-way ANOVA for the indicated comparison.
